# Supplementary material for: Manganese(ii) and copper(ii) nitrate bis-imidazole coordination polymers: dimensionality and product morphology
Source: Royal Society of Chemistry journal article supplement (doi:10.1039/c3ce41082j), 2013-01-01
Supplement: c3ce41082j.pdf [file c3ce41082j.pdf]

## Supporting Information for Coordination Nanoparticles: coordination polymer dimensionality and product morphology.

Victoria J. Richards, Alexander J. Blake, William Lewis, Harriott Nowell, Christopher D.J. Parmenter and Neil R. Champness\*

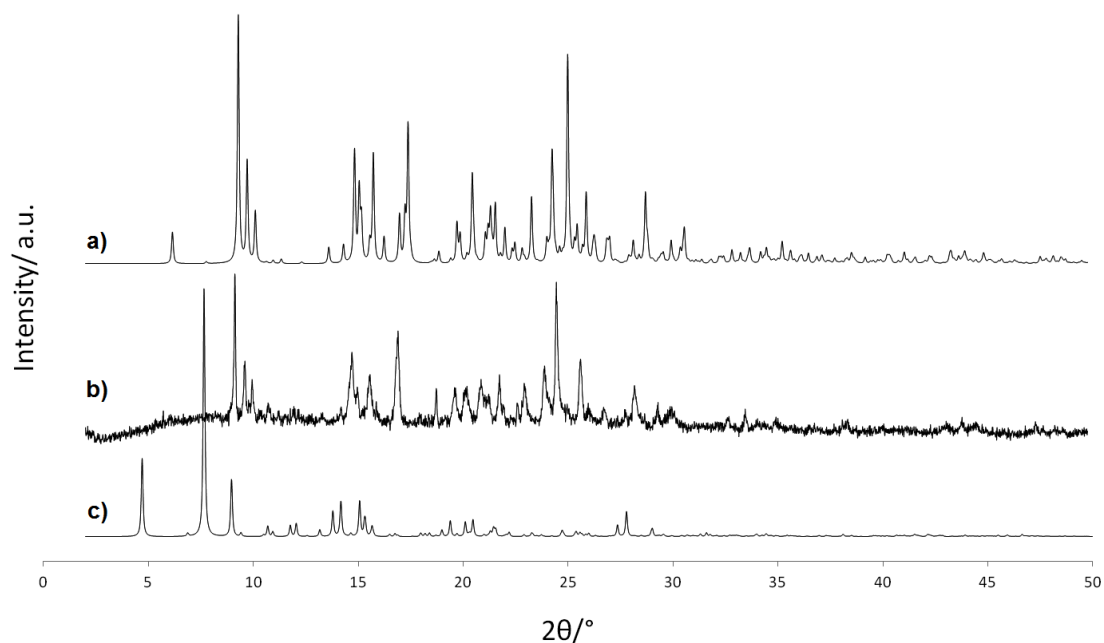

**Fig. S1.** a) The PXR pattern of **2** simulated from single crystal data, b) the experimental PXR for **2** and c) the PXR pattern of **3** simulated from single crystal data.

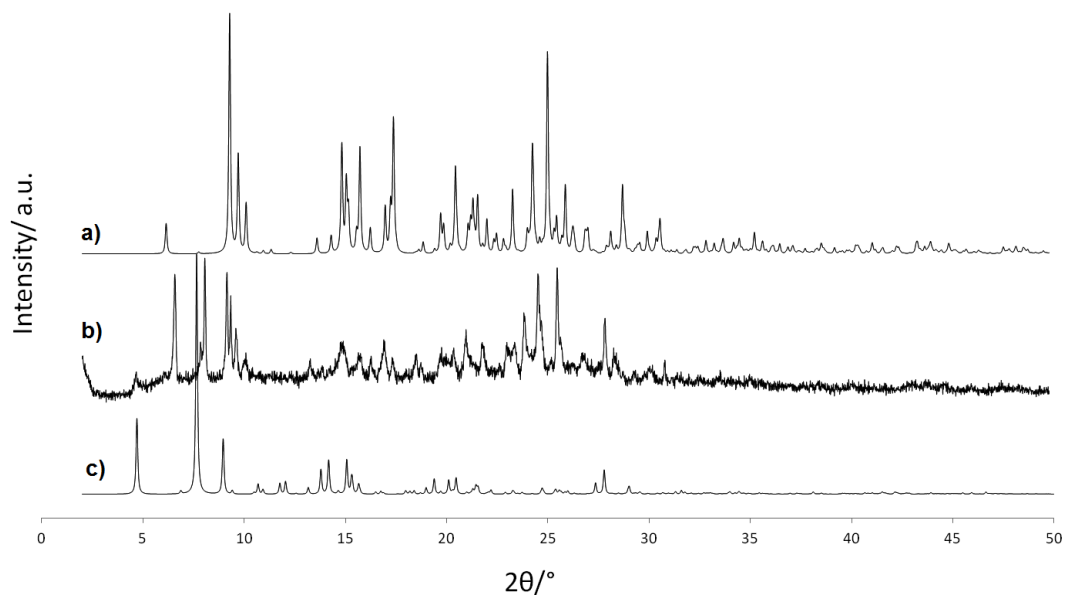

**Fig. S2.** a) The PXR pattern of **2** simulated from single crystal data, b) the experimental PXR for **3** and c) the PXR pattern of **3** simulated from single crystal data.
